# Supplementary material
Source: publisher figshare collection journal article supplement (https://tandf.figshare.com/articles/dataset/_/20449070)
Supplement: Supplementary file 1 [file 1]

## Sheet: Included in review
Authors	Title	Year	Source title	Abstract	Author Keywords	Language of Original Document	Document Type	Source
Le Gall, M., Overson, R., Cease, A.	A Global Review on Locusts (Orthoptera: Acrididae) and Their Interactions With Livestock Grazing Practices	2019	Frontiers in Ecology and Evolution	Connections between locusts and people date back millennia and locusts remain a major food security challenge today throughout the world. Locust biology is often linked to abiotic conditions like temperature and/or precipitation, fueling the perception that aside from active control, humans are not key players in the interaction locusts have with their environment. However, several studies have s…		English	Article	Scopus
Hauer, J., Nielsen, J.Ø.	Making land-use change and markets: the global-local entanglement of producing rice in Bagré, Burkina Faso	2020	Geografiska Annaler, Series B: Human Geography	Since the 1970s the government of Burkina Faso together with international donor organizations has pushed for increasing national rice production to cope with the country’s food import dependency. This paper traces this development and illustrates that rice production in Burkina Faso is the outcome of interrelated global and local processes. Drawing on nine months of ethnographic fieldwork in Bur…	rice; telecoupling; land use change; Burkina-Faso; Bagré; geographies of marketization	English	Article	Scopus
Llopis, J.C., Diebold, C.L., Schneider, F., (...), Messerli, P., Zaehringer, J.G.	Capabilities Under Telecoupling: Human Well-Being Between Cash Crops and Protected Areas in North-Eastern Madagascar	2020	Frontiers in Sustainable Food Systems	Global change processes are increasing their pace and reach, leading to telecoupled situations, where distant factors come to outpace local determinants of land use change. Often, these dynamics drive agricultural intensification processes, with as yet unclear implications for the well-being of human populations living in the areas affected. This study explores how two key telecoupling dynamics a…		English	Article	Scopus
Yawson, D.O., Armah, F.A., Adu, M.O.	Exploring the impacts of climate change and mitigation policies on UK feed barley supply and implications for national and transnational food security	2020	SN Applied Sciences	The destabilizing impacts of climate change make mitigation measures a global imperative and urgent. The Paris Agreement and the Sustainable Development Goal 13 give fresh impetus for climate change mitigation action. However, mitigation policies can have unintended consequences for food security. The current study assessed the impacts of UK climate mitigation policies on future food penalties (u…		English	Article	Scopus
Marola, E., Schöpfner, J., Gallemore, C., Jespersen, K.	The bandwidth problem in telecoupled systems governance: Certifying sustainable winemaking in Australia and Chile	2020	Ecological Economics	Telecoupled systems connect consumption and other choices in one part of the world with land-use and land-cover change in another. While such connections are increasingly well documented, research on governing telecoupled systems is in its infancy. Drawing on recent discussions in sociology, we argue that models for governing telecoupled systems must consider two types of information flows. Low-b…	TelecouplingSustainabilityWineDiffusionEnvironmental certification	English	Article	Scopus
Laroche, P.C.S.J., Schulp, C.J.E., Kastner, T., Verburg, P.H.	Telecoupled environmental impacts of current and alternative Western diets	2020	Global Environmental Change	Low-meat and no-meat diets are increasingly acknowledged as sustainable alternatives to current Western food consumption patterns. Concerns for the environment, individual health or animal welfare are raising consumers’ willingness to adopt such diets. Dietary shifts in Western countries may modify the way human-environment systems interact over distances, primarily as a result of existing trade …	Dietary changeTradeLand use changeEcosystem servicesTelecouplingTrade-offsEAT diet	English	Article	Scopus
Bicudo da Silva, R.F., Millington, J.D.A., Moran, E.F., Batistella, M., Liu, J.	Three decades of land-use and land-cover change in mountain regions of the Brazilian Atlantic Forest	2020	Landscape and Urban Planning	Mountain regions are key hotspots for biodiversity conservation and for provisioning ecosystem services. Containing fragile ecosystems and home to millions of inhabitants, mountains are also places of great value for tourism, cultural practices and endemic species. In this paper, we developed the first multitemporal land-use and land-cover assessment of mountain regions within the Brazilian Atlan…		English	Article	Scopus
Weng W., Becker S.L., Lüdeke M.K.B., Lakes T.	Landscape matters: Insights from the impact of mega-droughts on Colombia's energy transition	2020	Environmental Innovation and Societal Transitions	Mega-droughts can cause disruption to the affected society sparking a transition. We explore the causes and effects of the 2015−2016 mega-drought in Colombia. Using the multi-level perspective as a framework, we found that the mega-drought sparked an energy transition in Colombia whose dynamics were impacted both by the institutionalization of niches as well as the ability to predict the next dro…	Multi-level perspective; DroughtTransition pathways; Energy transition; Aerial river; Telecoupling	English	Article	Scopus
Schierhorn F., Kastner T., Kuemmerle T., Meyfroidt P., Kurganova I., Prishchepov A.V., Erb K.-H., Houghton R.A., Müller D.	Large greenhouse gas savings due to changes in the post-Soviet food systems	2019	Environmental Research Letters	As the global food system contributes significantly to global greenhouse gas (GHG) emissions, understanding the sources of GHG emissions embodied in different components of food systems is important. The collapse of the Soviet Union triggered a massive restructuring of the domestic food systems, namely declining consumption of animal products, cropland abandonment, and a major restructuring of ag…	Carbon sequestration; foods carbon footprint; former Soviet Union; telecoupling; trade	English	Article	Scopus
Fuller T.L., Narins T.P., Nackoney J., Bonebrake T.C., Sesink Clee P., Morgan K., Tróchez A., Bocuma Meñe D., Bongwele E., Njabo K.Y., Anthony N.M., Gonder M.K., Kahn M., Allen W.R., Smith T.B.	Assessing the impact of China's timber industry on Congo Basin land use change	2019	Area	Through the rise of global commodity chains, consumer demand in China and the USA has given rise to the extraction of natural resources in the Congo Basin. The Chinese market for high-valued animal products such as elephant ivory and pangolin scales has encouraged poaching, exploitation and trafficking of these goods in Africa. Chinese demand for other African commodities, however, remains less w…	biodiversity; Congo Basin; deforestation; global supply chains; telecoupling	English	Article	Scopus
Rulli M.C., Casirati S., Dell'Angelo J., Davis K.F., Passera C., D'Odorico P.	Interdependencies and telecoupling of oil palm expansion at the expense of Indonesian rainforest	2019	Renewable and Sustainable Energy Reviews	Global palm oil production has greatly increased in recent years with the adoption of renewable energy policies by the E.U. and U.S.A. and growing demand for its use in food, biodiesel, and other commodities. Indonesia, the world's largest oil palm producer, has leased large tracts of forested and tribal lands as new concessions, thereby expanding oil palm plantations. While previous studies have…	Biofuel; Deforestation; Fragmentation; Globalization; Indonesia; Oil palm; Rainforest; Telecoupling; Water scarcity, CO2 emissions	English	Article	Scopus
Chen W., Ye X., Li J., Fan X., Liu Q., Dong W.	Analyzing requisition–compensation balance of farmland policy in China through telecoupling: A case study in the middle reaches of Yangtze River Urban Agglomerations	2019	Land Use Policy	This study evaluates the requisition–compensation balance of farmland (RCBF) policy with the telecoupling framework of “quantity-quality-productivity-ecological balance” in the middle reaches of Yangtze River Urban Agglomerations (MRYRUA) in China from 1995 to 2015. The RCBF index characterizes the quantity balance of farmland, while the quality balance is measured by examining the differences of…	China; Ecological balance assessment; Gravity center analysis; Land use transfer matrix; Productivity balance identification; Telecoupling	English	Article	Scopus
Andriamihaja O.R., Metz F., Zaehringer J.G., Fischer M., Messerli P.	Land competition under telecoupling: Distant actors' environmental versus economic claims on land in North-Eastern Madagascar	2019	Sustainability (Switzerland)	In north-eastern Madagascar, maintenance of biodiversity competes with expansion of land for agriculture and mining. The concept of "telecoupling" provides a framework for analysis of distant actors and institutions that influence local land use decisions. However, there is a lack of knowledge regarding the extent of telecoupling of land governance in north-eastern Madagascar and a lack of eviden…	Land competition; Land governance; Land system science; Madagascar; Social network analysis; Telecoupling	English	Article	Scopus
Creutzig F., Bren D'Amour C., Weddige U., Fuss S., Beringer T., Gläser A., Kalkuhl M., Steckel J.C., Radebach A., Edenhofer O.	Assessing human and environmental pressures of global land-use change 2000-2010	2019	Global Sustainability	Global land is turning into an increasingly scarce resource. We here present a comprehensive assessment of co-occuring land-use change from 2000 until 2010, compiling existing spatially explicit data sources for different land uses, and building on a rich literature addressing specific land-use changes in all world regions. This review systematically categorizes patterns of land use, including re…	agriculture; earth systems (land, water and atmospheric); land use; natural resources (biological and non-biological); urban systems	English	Article	Scopus
Schaffer-Smith D., Tomscha S.A., Jarvis K.J., Maguire D.Y., Treglia M.L., Liu J.	Network analysis as a tool for quantifying the dynamics of metacoupled systems: An example using global soybean trade	2018	Ecology and Society	The metacoupling framework provides grounds for characterizing interactions within and between coupled human and natural systems, yet few studies quantify the nuances of these systems. Network analysis is a powerful and flexible tool that has been used to quantify social, economic, and ecological systems. Our objective was to evaluate the utility of network analysis for quantifying metacoupled sy…	Agriculture; Brazil; China; Connectivity; Coupled human and natural systems; Export; Graph theory; Import; Social-ecological systems; Telecoupling; USA	English	Article	Scopus
Galaz V., Crona B., Dauriach A., Scholtens B., Steffen W.	Finance and the Earth system – Exploring the links between financial actors and non-linear changes in the climate system	2018	Global Environmental Change	Financial actors and capital play a key role in extractive economic activities around the world, as well as in current efforts to avoid dangerous climate change. Here, in contrast to standard approaches in finance, sustainability and climate change, we elaborate in what ways financial actors affect key biomes around the world, and through this known “tipping elements” in the Earth system. We comb…	Climate change; Deforestation; Financial systems; Sustainable finance; Telecoupling; Tipping elements	English	Article	Scopus
Dou Y., da Silva R.F.B., Yang H., Liu J.	Spillover effect offsets the conservation effort in the Amazon	2018	Journal of Geographical Sciences	Diverse conservation efforts have been expanding around the globe, even under the stress of increasing agricultural production. A striking example is the supply-chain agreements put upon the Amazon forest which had reduced deforestation by 80% from the early 2000s (27,772 km2) to 2015 (6207 km2). However, evaluation of these conservation efforts usually focused on the impacts within the Amazon bi…	Amazon; Brazil; Cerrado; conservation; deforestation; development; soybean trade; spillover; telecoupling; voluntary agreement	English	Article	Scopus
Alexander P., Rabin S., Anthoni P., Henry R., Pugh T.A.M., Rounsevell M.D.A., Arneth A.	Adaptation of global land use and management intensity to changes in climate and atmospheric carbon dioxide	2018	Global Change Biology	Land use contributes to environmental change, but is also influenced by such changes. Climate and atmospheric carbon dioxide (CO2) levels’ changes alter agricultural crop productivity, plant water requirements and irrigation water availability. The global food system needs to respond and adapt to these changes, for example, by altering agricultural practices, including the crop types or intensity…	climate change adaptation; CO2 fertilisation; food system; land use change; land use intensity; telecoupling	English	Article	Scopus	Would be great if someone with more quantitative skills than me (Louise) could take a look at this one
Keys P.W., Wang-Erlandsson L.	On the social dynamics of moisture recycling	2018	Earth System Dynamics	The biophysical phenomenon of terrestrial moisture recycling connects distant regions via the atmospheric branch of the water cycle. This process, whereby the land surface mediates evaporation to the atmosphere and the precipitation that falls downwind, is increasingly well-understood. However, recent studies highlight a need to consider an important and often missing dimension-the social. Here, …		English	Article	Scopus
Yao G., Hertel T.W., Taheripour F.	Economic drivers of telecoupling and terrestrial carbon fluxes in the global soybean complex	2018	Global Environmental Change	Telecoupling is a novel concept describing simultaneous multiscale interactions between human and natural systems across long distances. One important vehicle for telecoupling is international agricultural trade, which has previously been addressed using multiregional input-output (MRIO) methods. This study advances that work by accounting for market-mediating factors based on the GTAP-BIO model.…	Computable general equilibrium; Land use; Soybean trade; Spillovers; Telecoupling	English	Article	Scopus
Zaehringer J.G., Llopis J.C., Latthachack P., Thein T.T., Heinimann A.	A novel participatory and remote-sensing-based approach to mapping annual land use change on forest frontiers in Laos, Myanmar, and Madagascar	2018	Journal of Land Use Science	Tropical forests are under pressure from both commercial and smallholder agriculture. Forest frontiers are seeing dynamic land use changes that frequently lead to land system regime shifts, posing challenges for the sustainability of entire local social-ecological systems. Monitoring highly dynamic land use change and detecting land system regime shifts is methodologically challenging due to trad…	land system regime shifts; land use change; Participatory mapping; remote sensing; telecoupling	English	Article	Scopus	Joel: I would suggest excluding as there is very little empirical material in the study; the authors explicate their procedure/method for obtaining accurate land-use maps by grounding input in local realities, but do not say anything about causal relationships, flows, analytical focus.
Oberlack C., Boillat S., Brönnimann S., Gerber J.-D., Heinimann A., Speranza C.I., Messerli P., Rist S., Wiesmann U.	Polycentric governance in telecoupled resource systems	2018	Ecology and Society	Recent advances in land system science and in institutional analysis provide complementary, but still largely disconnected perspectives on land use change, governance, and sustainability in social-ecological systems, which are interconnected across distance. In this paper we bring together the emerging concept of telecoupled land systems and the established concept of polycentric governance to su…	Institutional analysis; Land system science; Natural resources; Networks of action situations; Polycentric governance; Telecoupling	English	Article	Scopus
Friis C., Nielsen J.Ø.	Land-use change in a telecoupled world: The relevance and applicability of the telecoupling framework in the case of banana plantation expansion in Laos	2017	Ecology and Society	Land-use change is increasingly influenced by complex socioeconomic and environmental interactions that transcend spatial, institutional, and temporal scales. These interactions challenge classical place-based land system analysis and require new analytical approaches equipped for tackling processes, flows, and feedbacks over distance. The recently proposed telecoupling framework offers interesti…	Case-study research; Chinese investments; Distal flows; Feedbacks; Land systems; Land-use change; Laos; Qualitative research; Telecoupling	English	Article	Scopus
Montti L., Carrillo V.P., Gutiérrez-Angonese J., Gasparri N.I., Aragón R., Grau H.R.	The role of bioclimatic features, landscape configuration and historical land use in the invasion of an Asian tree in subtropical Argentina	2017	Landscape Ecology	Context: Knowing which factors determine the spread of plant invaders is a relevant issue in global ecology. Cultural landscapes both influence and are affected by exotic species. Although bioclimatic boundaries, seed sources and landscape configuration all control the invasion process, they have been mostly studied separately and independently from their distant drivers. Objectives: We followed …	Invasive species; Ligustrum lucidum; Species distribution; Telecoupled cultural landscapes	English	Article	Scopus	telecoupling primarily as context. Would be great with a second reviewer on this one
Millington J.D.A., Xiong H., Peterson S., Woods J.	Integrating modelling approaches for understanding telecoupling: Global food trade and local land use	2017	Land	The telecoupling framework is an integrated concept that emphasises socioeconomic and environmental interactions between distant places. Viewed through the lens of the telecoupling framework, land use and food consumption are linked across local to global scales by decision-making agents and trade flows. Quantitatively modelling the dynamics of telecoupled systems like this could be achieved usin…	Food; Land use; Modelling; Simulation; Telecoupling	English	Article	Scopus	the paper is about developing hybrid simulation models. I need a second look on the coding. We could also argue for it as primarily conceptual and exclude it. Joel: I agree, I could not identify any empirical element worth coding
da Silva R.F.B., Batistella M., Dou Y., Moran E., Torres S.M., Liu J.	The Sino-Brazilian telecoupled soybean system and cascading effects for the exporting country	2017	Land	The global food market makes international players intrinsically connected through the flow of commodities, demand, production, and consumption. Local decisions, such as new economic policies or dietary shifts, can foster changes in coupled human-natural systems across long distances. Understanding the causes and effects of these changes is essential for agricultural-export countries, such as Bra…	Global trade; Maize; Soybean; Telecoupling	English	Article	Scopus
Carrasco L.R., Chan J., McGrath F.L., Nghiem L.T.P.	Biodiversity conservation in a telecoupled world	2017	Ecology and Society	The environmental and socioeconomic interactions between distant regions of the world (“telecoupling”) are dramatically increasing. Telecoupling brings about new challenges and opportunities to biodiversity conservation that are of a larger magnitude and of a faster pace than ever observed before. Our understanding of the dynamics and leverage points of this telecoupled world is however limited. …	Certification; Environmental footprint; Globalization; Illegal wildlife trade; Leakage effects; Teleconnections	English	Article	Scopus	Joel: potentially remove since its purpose is to introduce a framework for telecoupling and biodiversity conservation based on literature, so lacks an empirical element; however, could include since it is based on literature, kind of empirical (???)
Prell C., Sun L., Feng K., He J., Hubacek K.	Uncovering the spatially distant feedback loops of global trade: A network and input-output approach	2017	Science of the Total Environment	Land-use change is increasingly driven by global trade. The term “telecoupling” has been gaining ground as a means to describe how human actions in one part of the world can have spatially distant impacts on land and land-use in another. These interactions can, over time, create both direct and spatially distant feedback loops, in which human activity and land use mutually impact one another over…	Embodied land; Feedback loops; Global trade; Land use; Telecoupling; Trade networks	English	Article	Scopus	would be great with a second reviewer here
Young K.R., Ponette-González A.G., Polk M.H., Lipton J.K.	Snowlines and Treelines in the Tropical Andes	2017	Annals of the American Association of Geographers	Examination of the dynamism of snowlines and treelines could provide insights into environmental change processes affecting land cover in the tropical Andes Mountains. Further, land cover at these ecotones represents a powerful lens through which to monitor and understand ecological processes across biophysical gradients while acknowledging their socioenvironmental dimensions. To illustrate this …	Andes Mountains; climate change; ecological succession; glacier recession; land use/land cover change	English	Article	Scopus
Sun J., TONG Y.-X., Liu J.	Telecoupled land-use changes in distant countries	2017	Journal of Integrative Agriculture	International food trade has become a key driving force of agricultural land-use changes in trading countries, which has influenced food production and the global environment. Researchers have studied agricultural land-use changes and related environmental issues across multi-trading countries together, but most studies rely on statistic data without spatial attributes. However, agricultural land…	agricultural land-use changes; moving window analysis; soybeans; spatial attributes; telecoupling	English	Article	Scopus
Torres S.M., Moran E.F., da Silva R.F.B.	Property rights and the soybean revolution: Shaping how China and Brazil Are Telecoupled	2017	Sustainability (Switzerland)	China currently has the largest population in the world and is currently experiencing rapid economic and urban growth, becoming the world's number one pork and poultry consumer. In order to meet this growing demand for meat, China has increased its demand for soybeans to produce chicken and pork. It has imported soybeans from the United States, Brazil, and Argentina, while keeping its soybean pro…	Agribusiness; Brazil; China; Property rights; Telecoupling	English	Article	Scopus
Hulina J., Bocetti C., Campa H., III, Hull V., Yang W., Liu J.	Telecoupling framework for research on migratory species in the Anthropocene	2017	Elementa	Migratory species are an important component of biodiversity and provide essential ecosystem services for humans, but many are threatened and endangered. Numerous studies have been conducted on the biology of migratory species, and there is an increased recognition of the major role of human dimensions in conserving migratory species. However, there is a lack of systematic integration of socioeco…	Conservation; Coupled human and natural system; Full annual cycle; Governance; Management; Salmon; Sea turtle; Telecoupling; Warbler wildebeest	English	Article	Scopus
Norder S.J., Seijmonsbergen A.C., Rughooputh S.D.D.V., van Loon E.E., Tatayah V., Kamminga A.T., Rijsdijk K.F.	Assessing temporal couplings in social–ecological island systems: Historical deforestation and soil loss on Mauritius (Indian Ocean)	2017	Ecology and Society	Temporal couplings, such as historical interactions between deforestation and soil loss, are responsible for the current state of a wide range of ecosystem services of the social–ecological system on Mauritius. Islands are suitable study sites for understanding temporal couplings and telecouplings because of their: (1) clearly defined physical boundaries, (2) finite local resources, and (3) relat…	Deforestation; Historical soil loss; Islands; Mauritius; RUSLE; Social–ecological systems; Telecouplings; Temporal couplings	English	Article	Scopus
Kozak J., Szwagrzyk M.	Have there been forest transitions? Forest transition theory revisited in the context of the Modifiable Areal Unit Problem	2016	Area	Forest transition, a concept introduced in the early 1990s by Alexander Mather, proposes a reversal of forest cover change trends: from long-term deforestation to stable or increasing forest cover. Several well-documented examples of forest transition have been described since its proposal, typically at the national level. Initially, forest transition was explained by endogenous drivers, yet rece…	Carpathians; forest transition; land use adjustment; MAUP; simulation; telecoupling	English	Article	Scopus
Leisz S.J., Rounds E., An N.T., Yen N.T.B., Bang T.N., Douangphachanh S., Ninchaleune B.	Telecouplings in the east-west economic corridor within borders and across	2016	Remote Sensing	In recent years, the concepts of teleconnections and telecoupling have been introduced into land-use and land-cover change literature as frameworks that seek to explain connections between areas that are not in close physical proximity to each other. The conceptual frameworks of teleconnections and telecoupling seek to explicitly link land changes in one place, or in a number of places, to distan…	Land change; Land-cover; Land-use; Livelihoods; Rural changes; Southeast Asia; Teleconnection; Telecoupling; Urban growth	English	Article	Scopus	would be great with a second reviewer on this one
Gasparri N.I., Kuemmerle T., Meyfroidt P., le Polain de Waroux Y., Kreft H.	The Emerging Soybean Production Frontier in Southern Africa: Conservation Challenges and the Role of South-South Telecouplings	2016	Conservation Letters	Soybean expansion has been a strong driver of deforestation and biodiversity loss in South America (SAM). Here, we highlight strong similarities in environmental, institutional, and other contextual conditions among SAM and Southern African (SAFR) dry forest and savanna regions, and compile evidence for an emerging soybean production frontier in SAFR. Knowledge transfer, cooperation, and direct i…	Agribusiness; Cattle; Dry forest; Land-use change; Savannas; Soybeans; Telecoupling	English	Article	Scopus
Gasparri N.I., le Polain de Waroux Y.	The Coupling of South American Soybean and Cattle Production Frontiers: New Challenges for Conservation Policy and Land Change Science	2015	Conservation Letters	Different drivers and places of land use change in South America have often been studied in isolation. Evidence suggests, however, that in many instances, both places and drivers are becoming increasingly interconnected. The growing diversification and internationalization of agricultural commodity chains is creating new linkages across production frontiers and sectors that have important implica…	Agribusiness; Argentina; Bolivia; Brazil; Cattle; Displacement; Land use change; Paraguay; Soybeans; Telecoupling	English	Article	Scopus	Joel: This strikes me as highly conceptual, with very little empirical input - worth to remove?
Kastner T., Erb K.-H., Haberl H.	Global human appropriation of net primary production for biomass consumption in the European union, 1986-2007	2015	Journal of Industrial Ecology	The ongoing globalization process strengthens the connections between different geographic regions through trade. Biomass products, such as food, fiber, or bioenergy, are increasingly traded globally, thereby leading to telecouplings between distant, seemingly unrelated regions. For example, restrictions for agricultural production or changes in bioenergy demand in Europe or the United States mig…	Biomass; Consumption-based accounts; Displacement of land use; Human appropriation of net primary production (HANPP); Industrial ecology; Telecoupling	English	Article	Scopus
Seaquist J.W., Johansson E.L., Nicholas K.A.	Architecture of the global land acquisition system: Applying the tools of network science to identify key vulnerabilities	2014	Environmental Research Letters	Global land acquisitions, often dubbed 'land grabbing' are increasingly becoming drivers of land change. We use the tools of network science to describe the connectivity of the global acquisition system. We find that 126 countries participate in this form of global land trade. Importers are concentrated in the Global North, the emerging economies of Asia, and the Middle East, while exporters are …	complex network; globalization; land grabbing; land systems science; telecoupling; vulnerability	English	Article	Scopus
Carter N.H., Viña A., Hull V., McConnell W.J., Axinn W., Ghimire D., Liu J.	Coupled human and natural systems approach to wildlife research and conservation	2014	Ecology and Society	Conserving wildlife while simultaneously meeting the resource needs of a growing human population is a major sustainability challenge. As such, using combined social and environmental perspectives to understand how people and wildlife are interlinked, together with the mechanisms that may weaken or strengthen those linkages, is of utmost importance. However, such integrated information is lacking…	Complex systems; Conservation; Endangered species; Interdisciplinary science; Wildlife science	English	Article	Scopus
Garrett R.D., Rueda X., Lambin E.F.	Globalization's unexpected impact on soybean production in South America: Linkages between preferences for non-genetically modified crops, eco-certifications, and land use	2013	Environmental Research Letters	The land use impacts of globalization and of increasing global food and fuel demand depend on the trade relationships that emerge between consuming and producing countries. In the case of soybean production, increasing trade between South American farmers and consumers in Asia and Europe has facilitated soybean expansion in the Amazon, Chaco, and Cerrado biomes. While these telecouplings have bee…	multi-stakeholder initiatives; supply chains; telecoupling; trade	English	Article	Scopus
McCord P., Tonini F., Liu J.	The Telecoupling GeoApp: A Web-GIS application to systematically analyze telecouplings and sustainable development	2018	Applied Geography	Global challenges, such as chronic hunger in developing and developed regions, loss of wildlife habitat, and the continuing rise of greenhouse gas emissions from human activities, can be addressed only through an integrated approach. The telecoupling concept is one such approach: it explores socioeconomic and environmental interactions among coupled human-natural systems over distances. The telec…	CHANS; International trade; Land-use change; Sustainable development; Telecoupling; webGIS	English	Article	Scopus
Zimmerer K.S., Lambin E.F., Vanek S.J.	Smallholder telecoupling and potential sustainability	2018	Ecology and Society	Smallholders are crucial for global sustainability given their importance to food and nutritional security, agriculture, and biodiversity conservation. Worldwide smallholders are subject to expanded telecoupling whereby their social-ecological systems are linked to large-scale socioeconomic and environmental drivers. The present research uses the synthesis of empirical evidence to demonstrate sma…	Agrobiodiversity; Argan; Biodiversity; Coffee; Eco-certification; Food security; Globalization; Maize; Nutritional security; Organic dairy; Private and public institutions; Resilience; Small-scale agriculture; Smallholders; Social-ecological systems; Spillovers; Sustainability; Telecoupling	English	Article	Scopus
Tonini F., Liu J.	Telecoupling toolbox: Spatially explicit tools for studying telecoupled human and natural systems	2017	Ecology and Society	Telecoupling is a novel interdisciplinary umbrella concept that enables natural and social scientists to understand and generate information for managing how humans and nature can sustainably coexist worldwide. The telecoupling framework gains its distinction by enabling researchers to dive deeply into systemic complexities, even if systems are far away from each other. It is also ambitious in it…	CHANS; Coupled human-natural systems; Cross-scale interactions; Decision-support tools; Environmental interactions; Human-environment interactions; Socioeconomic interactions; Spatially explicit tools; Telecoupling; Telecoupling framework	English	Article	Scopus
Schierhorn F., Meyfroidt P., Kastner T., Kuemmerle T., Prishchepov A.V., Müller D.	The dynamics of beef trade between Brazil and Russia and their environmental implications	2016	Global Food Security	Changes in the production or consumption of agricultural commodities in one place can drastically affect land use and the environment elsewhere. We show how changes in beef production and consumption in Russia following the breakdown of the Soviet Union in 1991 contributed to the emergence of a beef trade linkage between Brazil and Russia. We argue that the decline of Russian beef production afte…	Amazon; Brazil; Emissions; Globalization; Land use change; Telecouplings	English	Review	Scopus

## Sheet: Excluded from review
Authors	Title	Year	Source title	Abstract	Author Keywords	Language of Original Document	Document Type	Source
Munroe D.K., Batistella M., Friis C., Gasparri N.I., Lambin E.F., Liu J., Meyfroidt P., Moran E., Nielsen J.Ø.	Governing flows in telecoupled land systems	2019	Current Opinion in Environmental Sustainability	The increasing global interconnectivity influencing land system change brings with it new challenges for land-system science. We evaluate whether recent land-system science (LSS) research into telecoupling provides a basis to set normative goals or priorities for addressing sustainability in coupled human-natural systems. We summarize the challenges for sustainability in an increasingly telecoupl…		English	Review, theoretical	Scopus
Ma E., Cai J., Lin J., Han Y., Liao L., Han W.	Explanation of land use/cover change from the perspective of tele-coupling [远程耦合视角下的土地利用/覆被变化解释]	2019	Dili Xuebao/Acta Geographica Sinica	The existing research on the mechanism of LUCC cannot fully illustrate dynamics of land use/cover driven by long-distance interaction in the global context. To fill this gap, a theoretical framework of tele-coupling interpretation is intentionally introduced in this paper. Starting with a general overview of previous studies on the mechanism of LUCC in perspectives of human society development, a…	Cross-system synthesis; Driving force decomposition; Globalization; Land use/cover change; Tele-connection; Tele-coupling; Urbanization	Chinese	Article, Chinese	Scopus
Paitan C.P., Verburg P.H.	Methods to assess the impacts and indirect land use change caused by telecoupled agricultural supply chains: A review	2019	Sustainability (Switzerland)	The increasing international trade of agricultural products has contributed to a larger diversity of food at low prices and represents an important economic value. However, such trade can also cause social, environmental and economic impacts beyond the limits of the countries directly involved in the exchange. Agricultural systems are telecoupled because the impacts caused by trade can generate i…	Agricultural commodities; Food systems; Impact assessment; Indirect land use change; Life cycle assessment; Supply chain; Sustainability; Telecoupling	English	Review	Scopus
Seppelt R., Verburg P.H., Norström A., Cramer W., Václavik T.	Focus on cross-scale feedbacks in global sustainable land management	2018	Environmental Research Letters	[No abstract available]	land use; place-based research; scenario analysis; tele-coupling; transferability	English	Review	Scopus
Bruckner M., Fischer G., Tramberend S., Giljum S.	Measuring telecouplings in the global land system: A review and comparative evaluation of land footprint accounting methods	2015	Ecological Economics	In an increasingly globalized world with more and more distributed international supply chains, sustainability studies and policies need to consider socioeconomic and environmental interactions between distant places. Studies of the global biomass metabolism investigate physical flows between and within nature and human systems, thus providing a useful basis for understanding the interrelatedness…	Global land system; Input-output analysis; Land footprint; Material flow analysis; Physical flow accounting; Telecouplings	English	Short Survey	Scopus
Verburg P.H.	The representation of human-environment interactions in land change research and modelling	2014	Understanding Society and Natural Resources: Forging New Strands of Integration Across the Social Sciences	Land change is the result of multiple human-environment interactions operating across different scales. Land change research needs to account for processes ranging from global trade of food and energy to the local management of land resources at farm and landscape level. Land change has a pronounced impact on the local and global environment. Land change may cause degradation of the living enviro…		English	Book Chapter	Scopus
Eakin H., DeFries R., Kerr S., Lambin E.F., Liu J., Marcotullio P.J., Messerli P., Reenberg A., Rueda X., Swaffield S.R., Wicke B., Zimmerer K.	Significance of telecoupling for exploration of land-use change	2014	Rethinking Global Land Use in an Urban Era	Land systems are increasingly influenced by distal connections: the externalities and unintended consequences of social and ecological processes which occur in distant locations, and the feedback mechanisms that lead to new institutional developments and governance arrangements. Economic globalization and urbanization accentuate these novel telecoupling relationships. The prevalence of telecoupli…		English	Book Chapter	Scopus
Seto K.C., Reenberg A.	Rethinking global land use in an urban era	2014	Rethinking Global Land Use in an Urban Era	Today, global land use is affected by a variety of factors, including urbanization and the growing interconnectedness of economies and markets. This book examines the challenges and opportunities we face in achieving sustainable land use in the twenty-first century. While land resources remain finite, the global population is projected to reach ten billion by the end of the century, bringing issu…		English	Book	Scopus
Liu J., Hull V., Moran E., Nagendra H., Swaffield S.R., Turner B.L., II	Applications of the telecoupling framework to land-change science	2014	Rethinking Global Land Use in an Urban Era	Over the past two decades, progress has been made in understanding and predicting land-use change in specific places, using frameworks such as coupled human-natural systems, coupled human-environmental systems, or coupled social-ecological systems. However, land-use change around the world is increasingly being driven by new agents and causes w hich emanate from distant locations, through forces …		English	Book Chapter	Scopus
Reenberg A., Fenger N.A.	Globalizing land use transitions: The soybean acceleration	2011	Geografisk Tidsskrift	This note presents the recent global development trends in soybean cultivation as derived from the FAO statistics. It focuses on the change over the course of the last thirty years, when significant new allocations of the global production have occurred, which have turned South America into a leading player on the global scale. It takes point of departure in a land change science approach and emp…	Human-environment system; Land use change; Teleconnection; Telecoupling	English	Note	Scopus
Friis C., Nielsen J.Ø., Otero I., Haberl H., Niewöhner J., Hostert P.	From teleconnection to telecoupling: taking stock of an emerging framework in land system science	2016	Journal of Land Use Science	Land use change is influenced by a complexity of drivers that transcend spatial, institutional and temporal scales. The analytical framework of telecoupling has recently been proposed in land system science to address this complexity, particularly the increasing importance of distal connections, flows and feedbacks characterising change in land systems. This framework holds important potential fo…	globalization; interdisciplinary work; land systems; land use change; teleconnection; telecoupling	English	Article, theoretical	Scopus
Schaffartzik A., Haberl H., Kastner T., Wiedenhofer D., Eisenmenger N., Erb K.-H.	Trading land: A review of approaches to accounting for upstream land requirements of traded products	2015	Journal of Industrial Ecology	Land use is recognized as a pervasive driver of environmental impacts, including climate change and biodiversity loss. Global trade leads to "telecoupling" between the land use of production and the consumption of biomass-based goods and services. Telecoupling is captured by accounts of the upstream land requirements associated with traded products, also commonly referred to as land footprints. T…	Environmental accounting; Environmental input-output analysis; Industrial ecology; Land footprint; Land use; Trade	English	Article, review, conceptual	Scopus
Baumann M., Kuemmerle T.	The impacts of warfare and armed conflict on land systems	2016	Journal of Land Use Science	Land-use decisions can change abruptly in response to shocks, and warfare and armed conflicts are among the most drastic and globally frequent shocks. Yet, our understanding of where armed conflict affects land systems, how land-use patterns are impacted, and how far-reaching and persistent these changes are, is partial. We used a spatially detailed dataset on armed conflict and a literature revi…	agricultural abandonment; armed conflict; case studies; deforestation; land-cover change; land-use change; re-cultivation; remote sensing; Warfare	English	Article, review	Scopus	I coded half but then decided to exclude it because it's not interacting with telecoupling
Magliocca N.R., Ellis E.C.	Evolving human landscapes: a virtual laboratory approach	2016	Journal of Land Use Science	Different human societies shape landscapes differently. Anthroecology theory explains this long-term differential shaping of landscapes as the product of sociocultural niche construction (SNC): an evolutionary theory coupling social change with ecosystem engineering. The evolutionary mechanisms underpinning this theory cannot be tested without experimental approaches capable of reproducing emerge…	coupled human natural systems (CHANS); geography; Land-use theory; simulation; social-ecological systems (SES); telecoupling	English	Article, theoretical	Scopus	Would exclude this one as it is primarily theoretical and does not treat a specific emprirical case
Wang Q., Ren Q., Liu J.	Identification and apportionment of the drivers of land use change on a regional scale: Unbiased recursive partitioning-based stochastic model application	2016	Agriculture, Ecosystems and Environment	Land-system science places increasing emphasis on the complex, telecoupled and often nonlinear nature of land-system changes. Categorical diversity, spatial-temporal heterogeneity and the rapid change rate of land use drivers challenged researchers to determine this sophisticated nature of landscape changes at the regional scale. This study aims to develop a new framework, involving remote sensin…	Conditional inference tree; Driver; Land use change; Random forest; Regional scale; Stochastic model	English	Article	Scopus	I coded half but then decided to exclude it because it's not interacting with telecoupling
Rasmussen L.V., Nielsen J.Ø.	Staying with the system: Theoretical consistency and change in Danish geographical work on the Sahel	2014	Geografisk Tidsskrift	Scholars have studied the Sahel intensely since major droughts hit the region in the early 1970s. One of the most persistent of these in terms of both volume and time span is Anette Reenberg. In this paper we explore her studies of the Sahel published in peer-reviewed journals and their impact over the last three decades. Reenberg has had a remarkably stable theoretical agenda concerned with the …	global change; human-environmental systems; land use; telecoupled systems	English	Article, review	Scopus	This is a review paper which we decided to exclude from the review
Friis C., Nielsen J.	On the system. Boundary choices, implications, and solutions in telecoupling land use change research	2017	Sustainability (Switzerland)	Land-based production provides societies with indispensable goods such as food, feed, fibre, and energy. Yet, with economic globalisation and global population growth, the environmental and social trade-offs of their production are ever more complex. This is particularly so since land use changes are increasingly embedded in networks of long-distance flows of, e.g., material, energy, and informat…	Banana plantations; China; Coupled human-environment systems; Land systems; Land use change; Laos; Scale; System boundaries; Telecoupling	English	Article, theoretical	Scopus	Obs same empirical as the other Friis and Nielsen paper
Radel C., Jokisch B.D., Schmook B., Carte L., Aguilar-Støen M., Hermans K., Zimmerer K., Aldrich S.	Migration as a feature of land system transitions	2019	Current Opinion in Environmental Sustainability	Human migration to and from rural areas is so prominent and persistent globally that land system science must understand how the movement of people is integral to land system transitions both at the origin of migration and at its destination. With a focus on Latin America, we review research on how land change affects migration and how migration affects land systems, to demonstrate that the relat…		English	Review, opinion	Scopus
Yawson D.O.	Climate Mitigation and Hidden Vulnerabilities: Widening the Food Gap between the Global North and South	2020	Environmental Justice	This study used the United Kingdom and feed barley as case example to highlight the potential of climate mitigation policies in the global north to create food vulnerabilities in the global south or widen the food gap between the global north and south. Future UK feed barley supply was assessed under the influence of projected climate change, climate mitigation policy scenarios, and population gr…	barleyclimate change mitigationclimate justicefood securityland use changetelecoupled impacts	English	Article	Scopus	Does not mention telecoupling in article only keyword
